# Supplementary material for: Production and Secretion of Isowighteone in Hairy Root Cultures of Pigeon Pea (Cajanus cajan) Co-Treated with Multiple Elicitors
Source: MDPI journal article supplement (doi:10.3390/plants11060834), 2022-03-21
Supplement: s1 [file s1]

# Supplementary Information

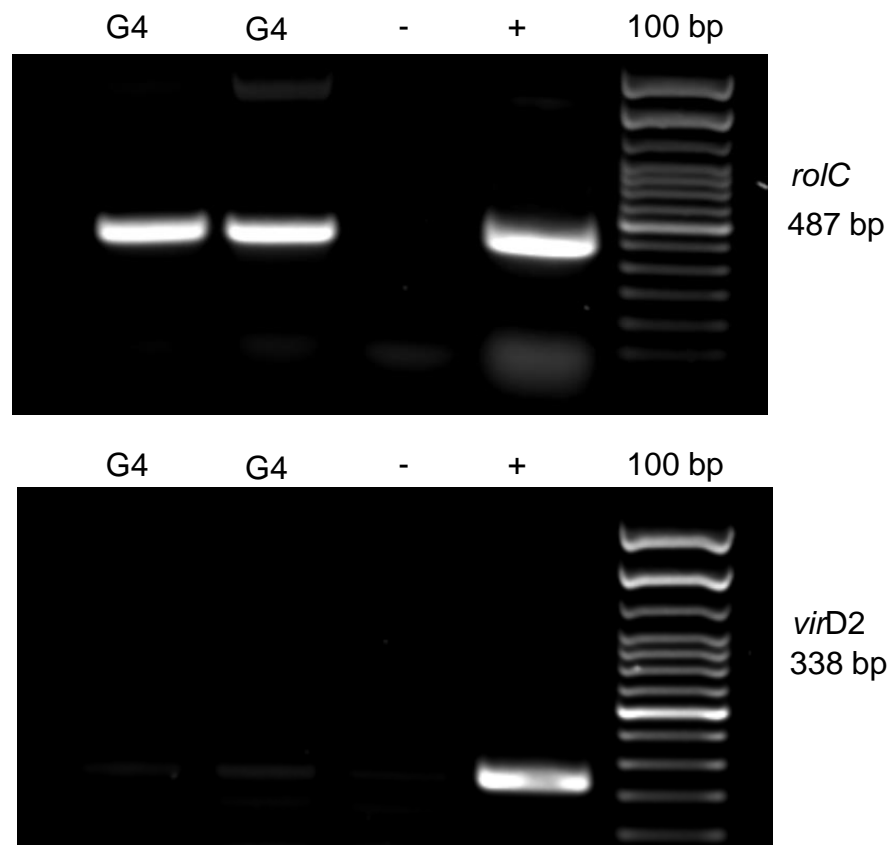

**Figure S1.** Molecular analysis by PCR of hairy roots of pigeon pea (line G4). Primers targeting the *aux1*, *roIC* and *virD2* genes were used. Plasmid pRiK599 was used as positive control and ddH<sub>2</sub>O was used as negative control.

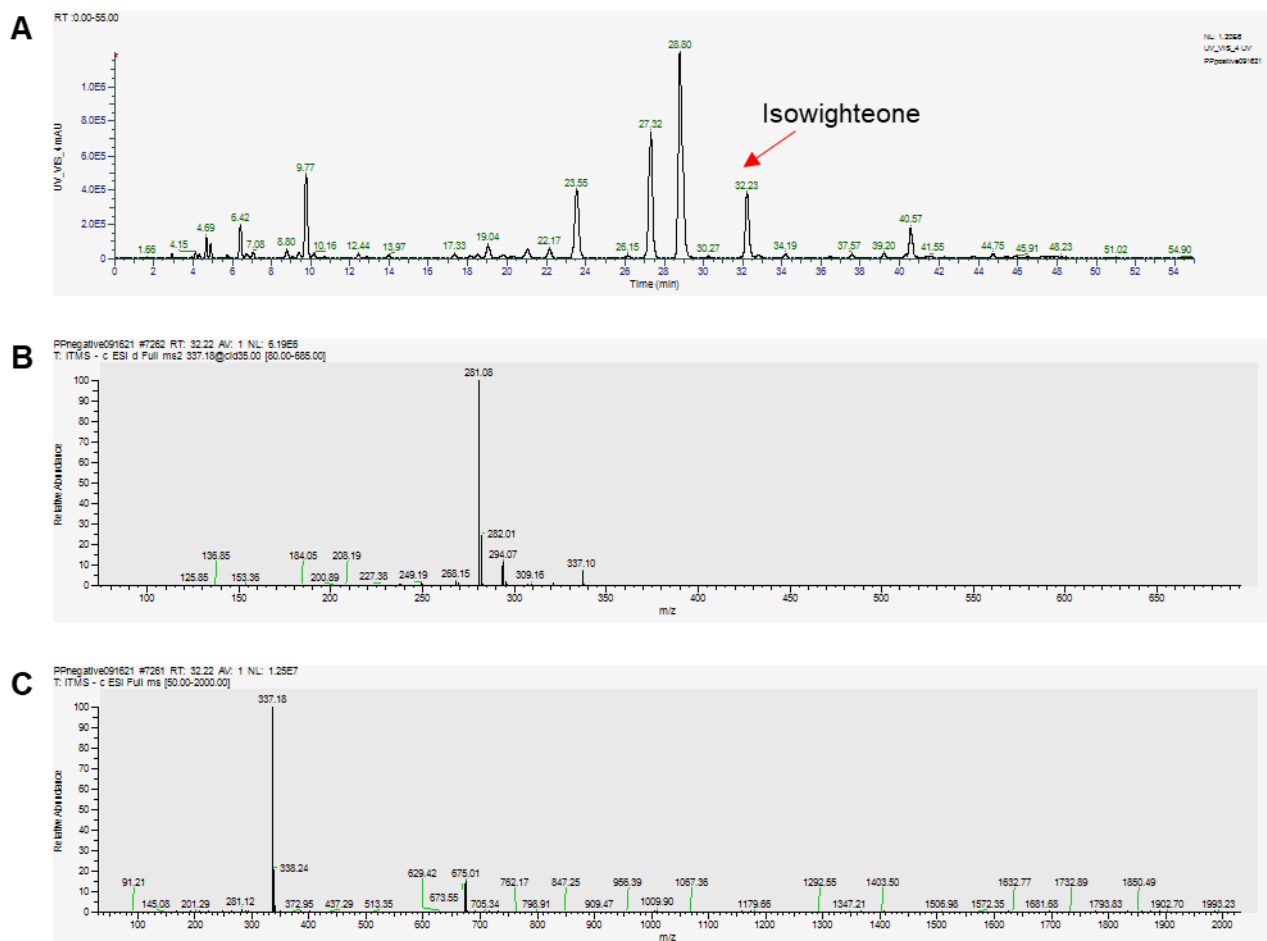

**Figure S2.** LC-MS analysis of Isowighteone under negative mode. (A) HPLC chromatogram of ethyl acetate extract of pigeon pea; (B) MS ion chromatogram; (C) MS<sup>2</sup> ion chromatogram
